# Supplementary material
Source: ML conference proceedings conference paper supplement (https://openaccess.thecvf.com/content/WACV2022/html/Hinz_CharacterGAN_Few-Shot_Keypoint_WACV_2022_paper.html)
Supplement: Supplementary file 1 [file Hinz_CharacterGAN_Few-Shot_Keypoint_WACV_2022_supplemental.pdf]

# CharacterGAN: Few-Shot Keypoint Character Animation and Reposing Supplementary Material

Tobias Hinz<sup>1,2</sup>   Matthew Fisher<sup>2</sup>   Oliver Wang<sup>2</sup>   Eli Shechtman<sup>2</sup>   Stefan Wermter<sup>1</sup>  
<sup>1</sup>University of Hamburg   <sup>2</sup>Adobe Research

## 1. Keypoint Modification

Figure 1 shows more examples of keypoint modifications with CharacterGAN. Figure 2 and Figure 3 show images generated based on linearly interpolated keypoint positions between a start and end-frame, generated by our model, SinGAN [4], ConSinGAN [1], and DeepSIM [6].

## 2. Mask Connectivity

Figure 4 shows how the final image quality can be improved by ensuring that the generated mask is connected.

## 3. Discrete States

Figure 5 shows how CharacterGAN switches between discrete states based on keypoint locations.

## 4. Data and Reconstructions

Figure 6 and Figure 7 show the reconstructions of our CharacterGAN and its ablations for all training images we used for the quantitative evaluation. Figure 8, Figure 9, and Figure 10 show the reconstructions of all baseline models for all training images we used for the quantitative evaluation.

## 5. Implementation Details

Our model is based on pix2pixHD architecture [7], with 32 convolutional filters in the first layer of the generator and 64 convolutional filters in the first layer of the discriminator. We train our models on images of resolution  $250 \times 250$  pixels. Our batch size is 5 and we train for 16,000 iterations, which takes about 40 minutes on an NVIDIA RTX 2080Ti. We use the Adam optimizer [2] and a learning rate of 0.0002 ( $\beta_1 = 0.5$ ) for the generator and discriminator which we linearly reduce during the last 8,000 iterations. We use instance norm [5] in both the discriminator and generator. The generator uses rectified linear units (ReLU) as non-linearity, while the discriminator uses leaky ReLU with a negative slope of 0.2.

Our generator takes as input the conditioning information ( $250 \times 250$  pixels) and applies several convolutional layers with stride 2 until we reach a resolution of  $16 \times 16$  with 1,024 channels. We then apply nine residual blocks, each with 512 filters to this, before using transposed convolutional layers to upsample the data to the original resolution of  $250 \times 250$  pixels. Our adaptive normalization technique is similar to SPADE [3], however, we use different conditioning layers for each of the keypoint layers. We use two patch discriminators, one operating on the original input ( $250 \times 250$  pixels) and one operating on a downsampled version of the input ( $125 \times 125$  pixels). Both discriminators consist of five convolutional layers, of which the first three have a stride of two and the final two a stride of one.

## References

- [1] Tobias Hinz, Matthew Fisher, Oliver Wang, and Stefan Wermter. Improved techniques for training single-image gans. In *IEEE Winter Conference on Applications of Computer Vision*, pages 1300–1309, 2021. 1
- [2] Diederik P Kingma and Jimmy Ba. Adam: A method for stochastic optimization. In *International Conference on Learning Representations*, 2015. 1
- [3] Taesung Park, Ming-Yu Liu, Ting-Chun Wang, and Jun-Yan Zhu. Semantic image synthesis with spatially-adaptive normalization. In *Proceedings of the IEEE Computer Vision and Pattern Recognition*, 2019. 1
- [4] Tamar Rott Shaham, Tali Dekel, and Tomer Michaeli. Singan: Learning a generative model from a single natural image. In *Proceedings of the IEEE International Conference on Computer Vision*, pages 4570–4580, 2019. 1
- [5] Dmitry Ulyanov, Andrea Vedaldi, and Victor Lempitsky. Instance normalization: The missing ingredient for fast stylization. *arXiv preprint arXiv:1607.08022*, 2016. 1
- [6] Yael Vinker, Eliahu Horwitz, Nir Zabari, and Yedid Hoshen. Deep single image manipulation. *arXiv preprint arXiv:2007.01289*, 2020. 1
- [7] Ting-Chun Wang, Ming-Yu Liu, Jun-Yan Zhu, Andrew Tao, Jan Kautz, and Bryan Catanzaro. High-resolution image synthesis and semantic manipulation with conditional gans. In *Proceedings of the IEEE Computer Vision and Pattern Recognition*, pages 8798–8807, 2018. 1

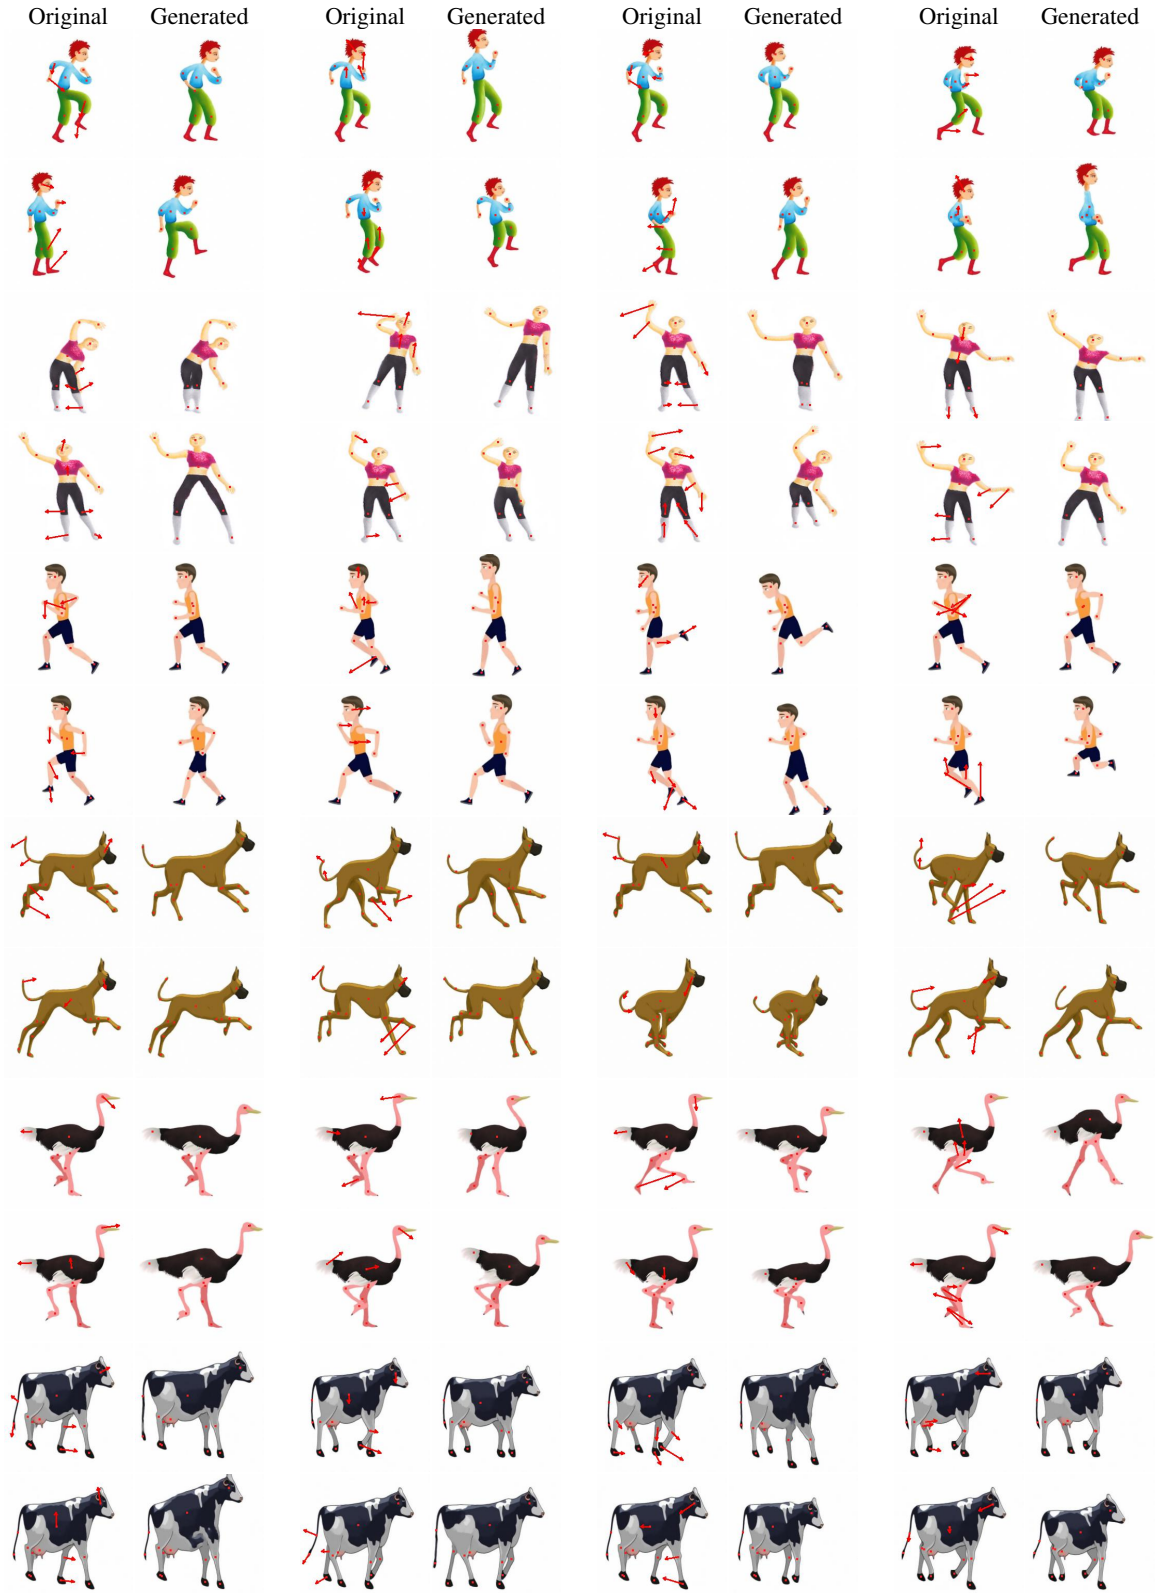

Figure 1: Examples from our model which was trained on only 8 – 12 images for each of the characters. Even columns show the original image and our intended modifications, odd columns show the output of our model.

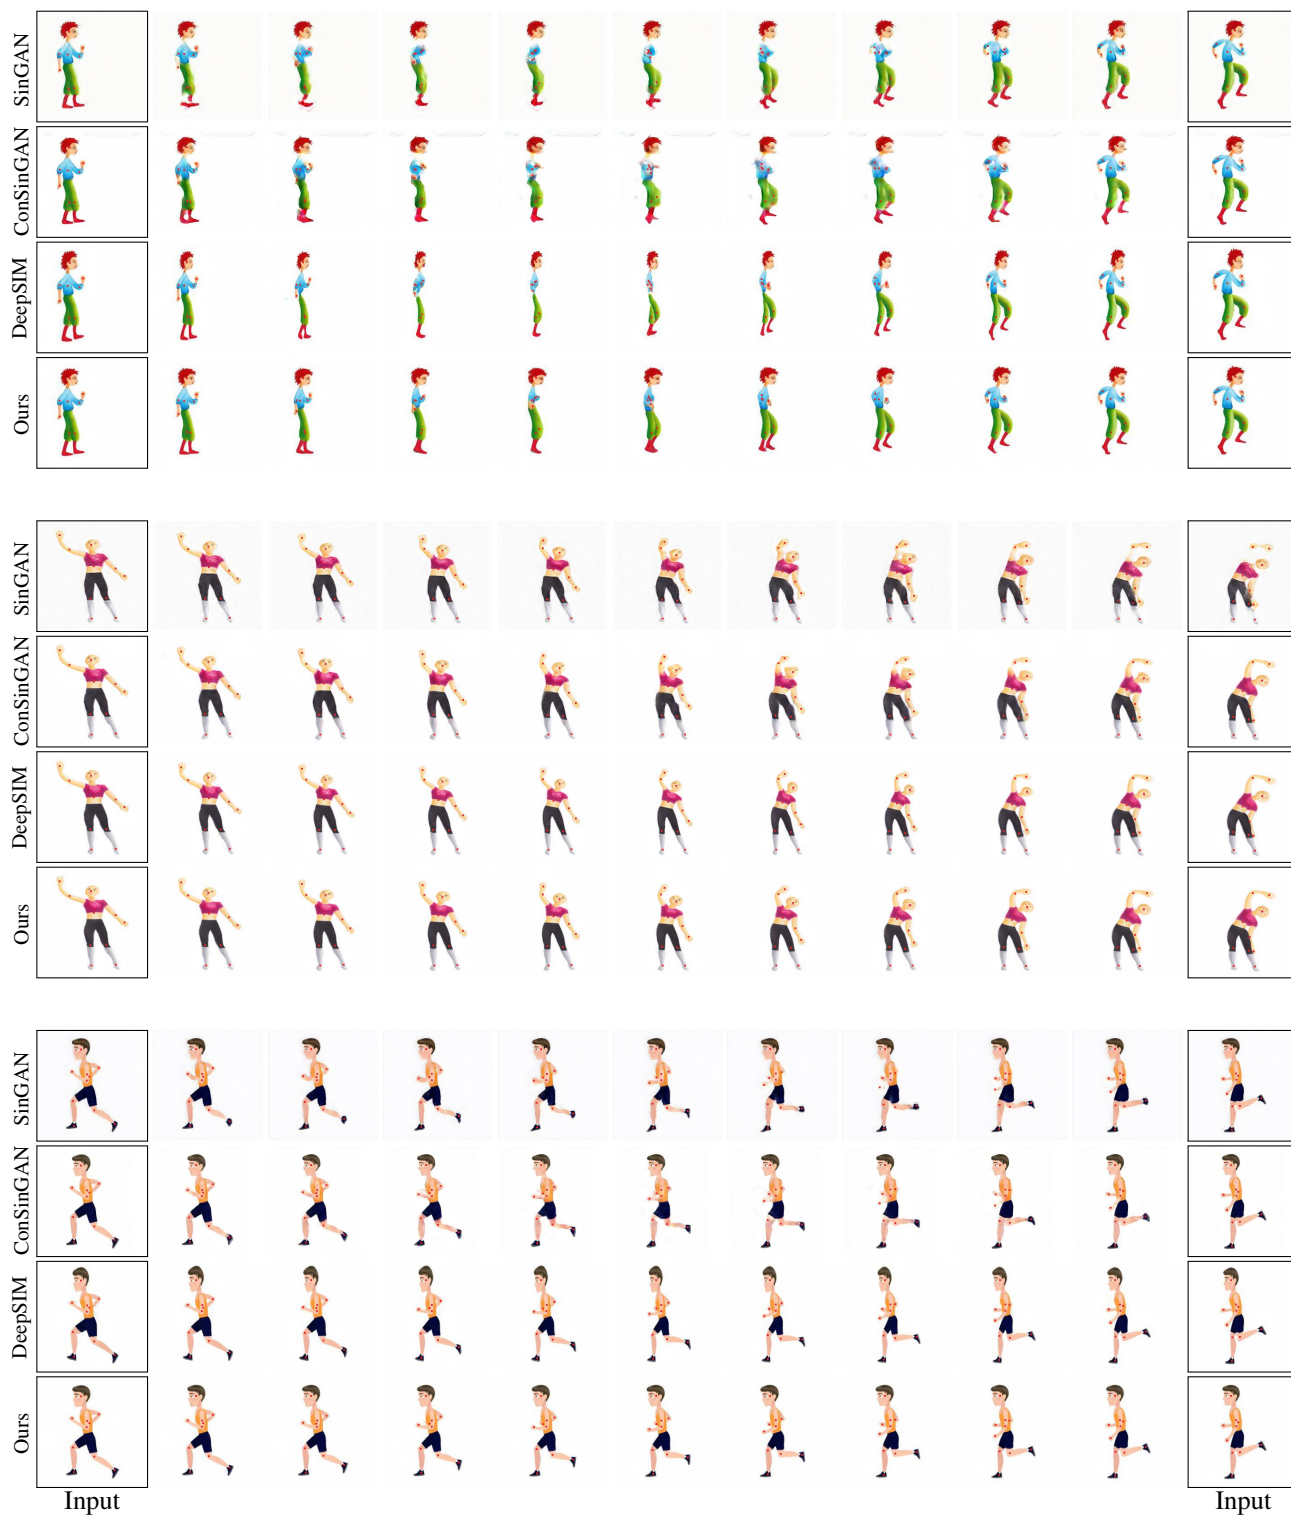

Figure 2: We show interpolated frames generated by our baselines and CharacterGAN between a *single* start and end frame (left and right columns) whose keypoint layouts are contained in the train set. All intermediate image are generated from linear interpolations of the start and end keypoint layouts and are not contained in the train set. For better comparison with the baselines we do not use the patch-based refinement step on our model for these visualization.

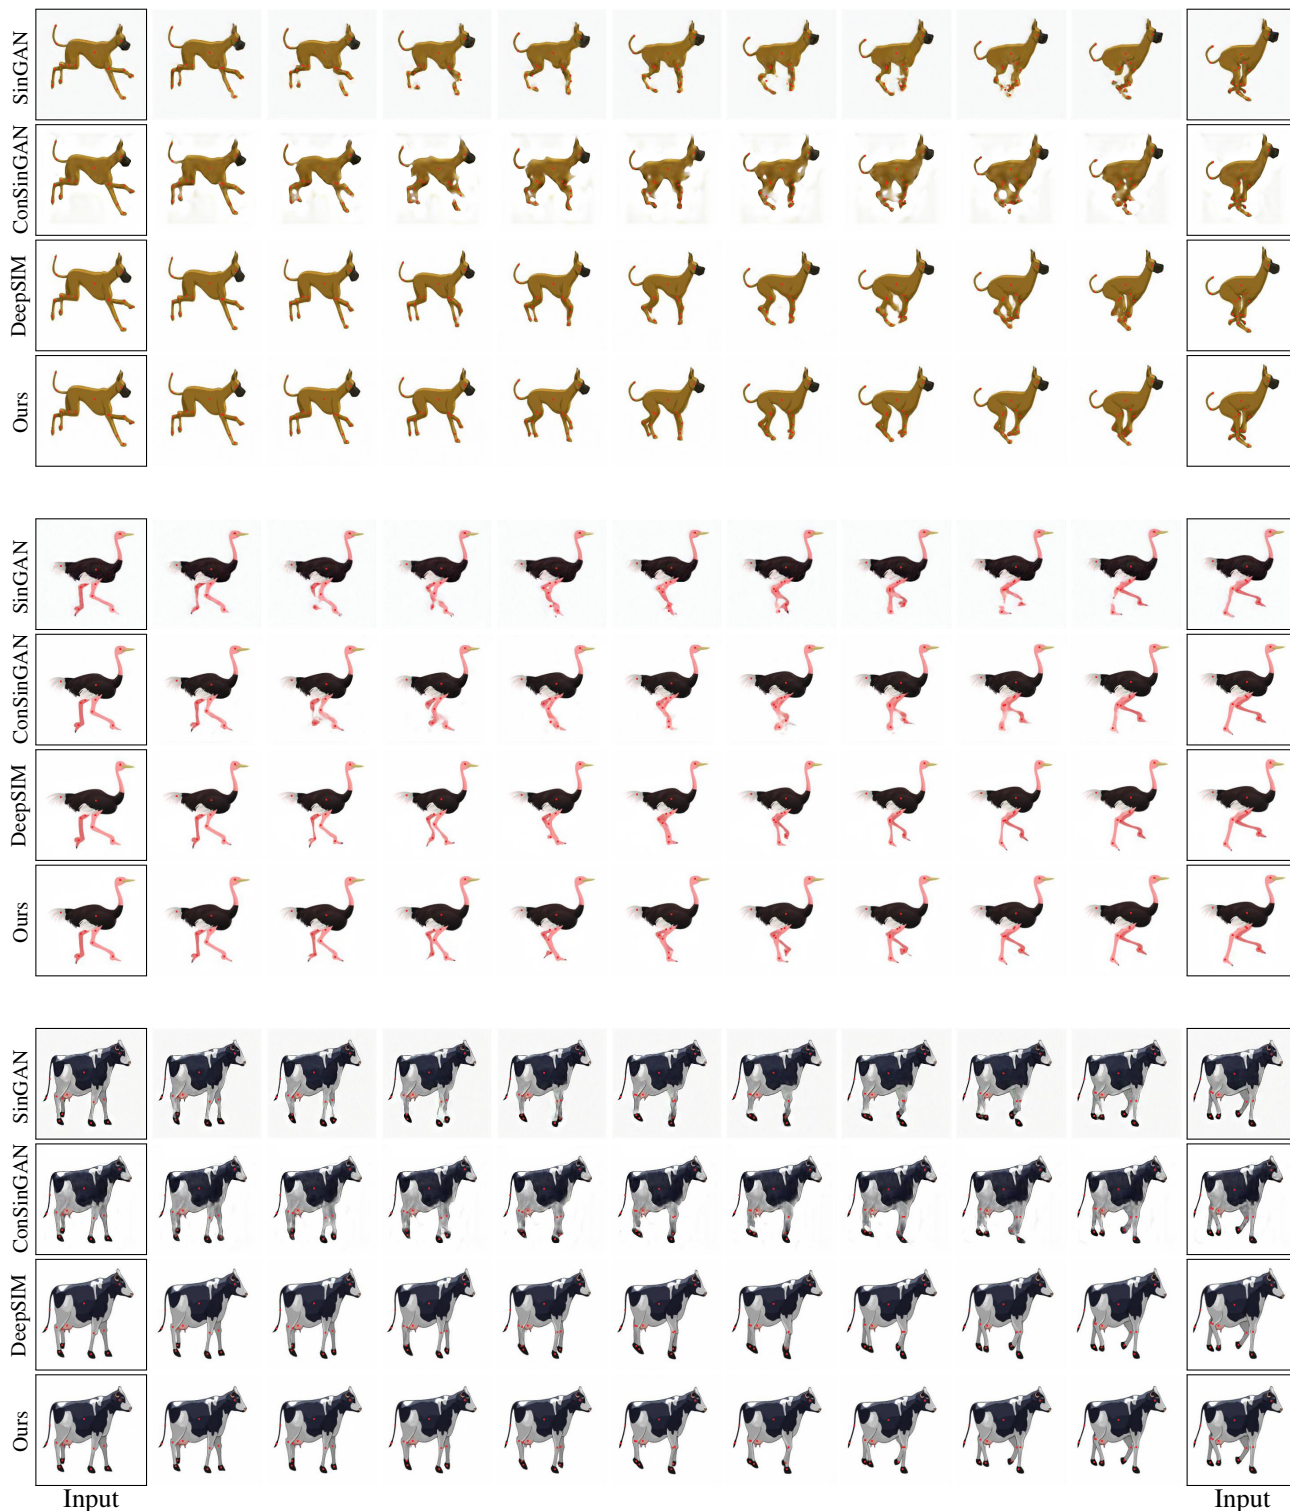

Figure 3: We show interpolated frames generated by our baselines and CharacterGAN between a *single* start and end frame (left and right columns) whose keypoint layouts are contained in the train set. All intermediate image are generated from linear interpolations of the start and end keypoint layouts and are not contained in the train set. For better comparison with the baselines we do not use the patch-based refinement step on our model for these visualization.



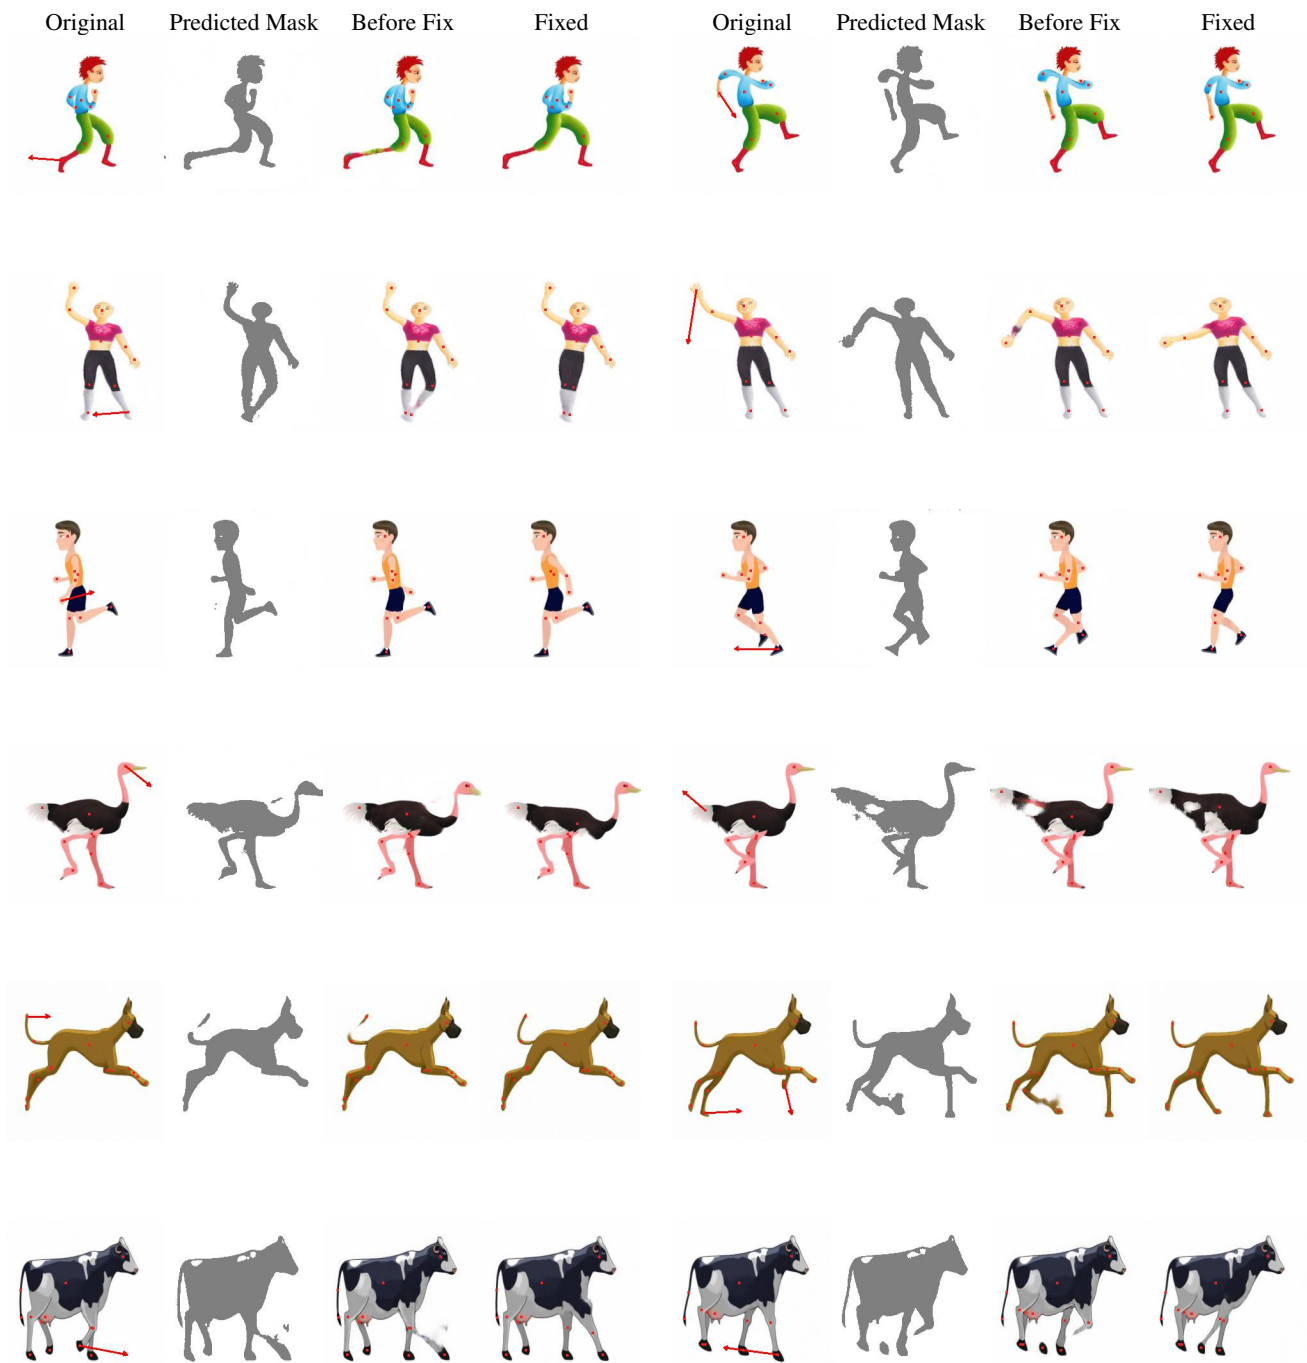

Figure 4: Enforcing mask connectivity at test time results in more realistic images.

Original

Interpolations

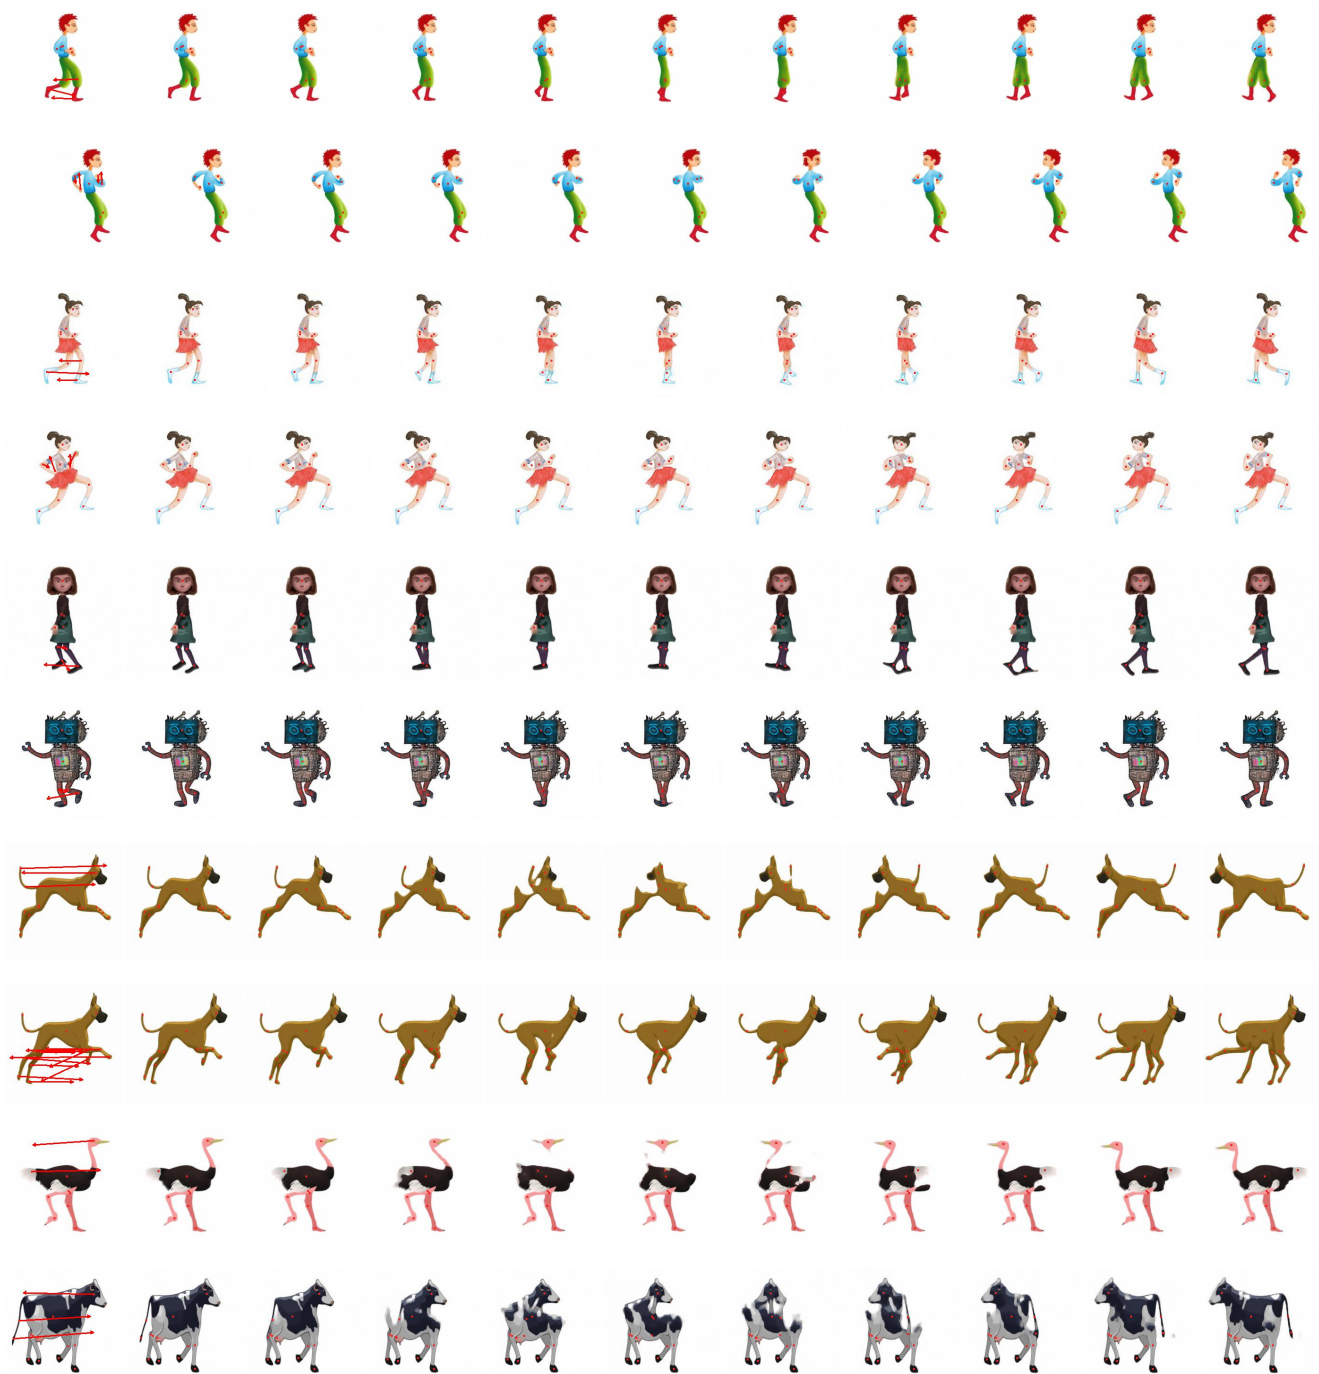

Figure 5: Discrete states based on keypoint location. The first column shows the original image and intended modifications. The rest of the columns show the generated images, based on linear keypoint interpolations between the start image and the final keypoints locations based on the intended modifications.

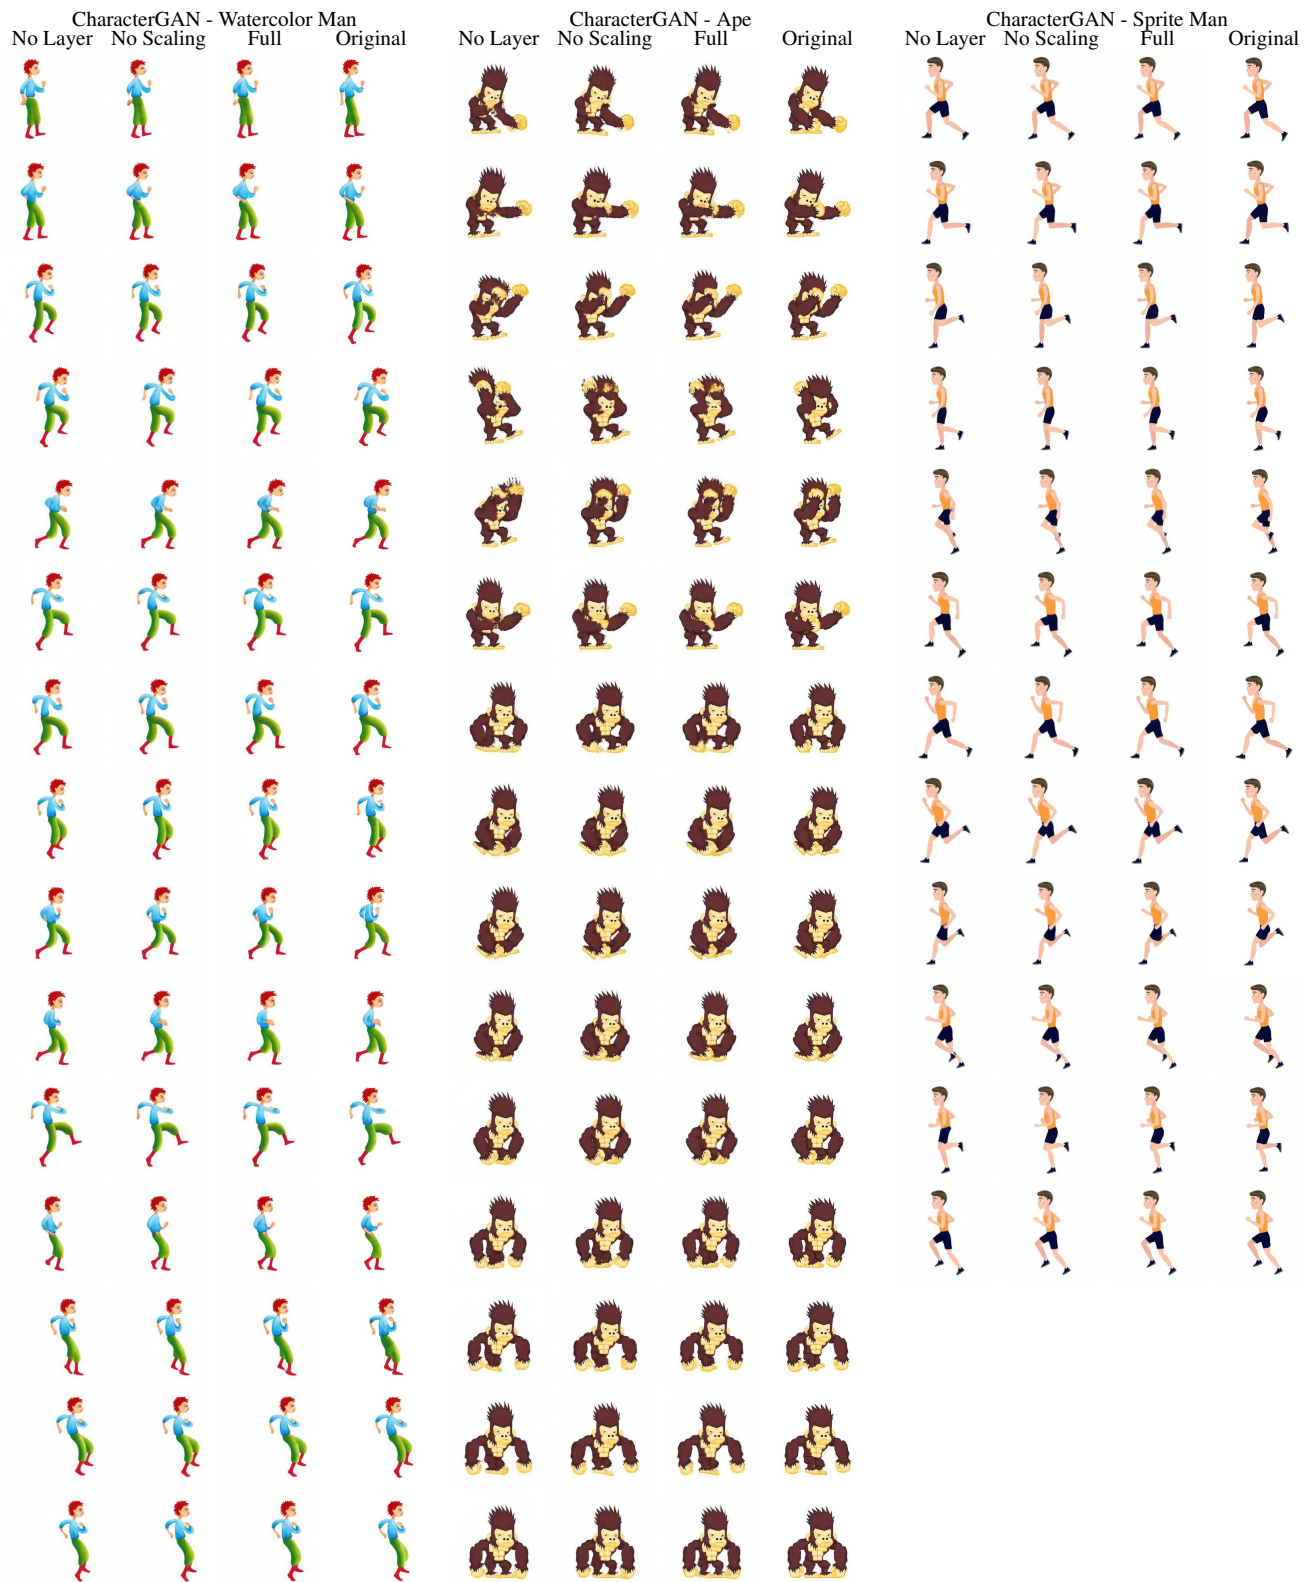

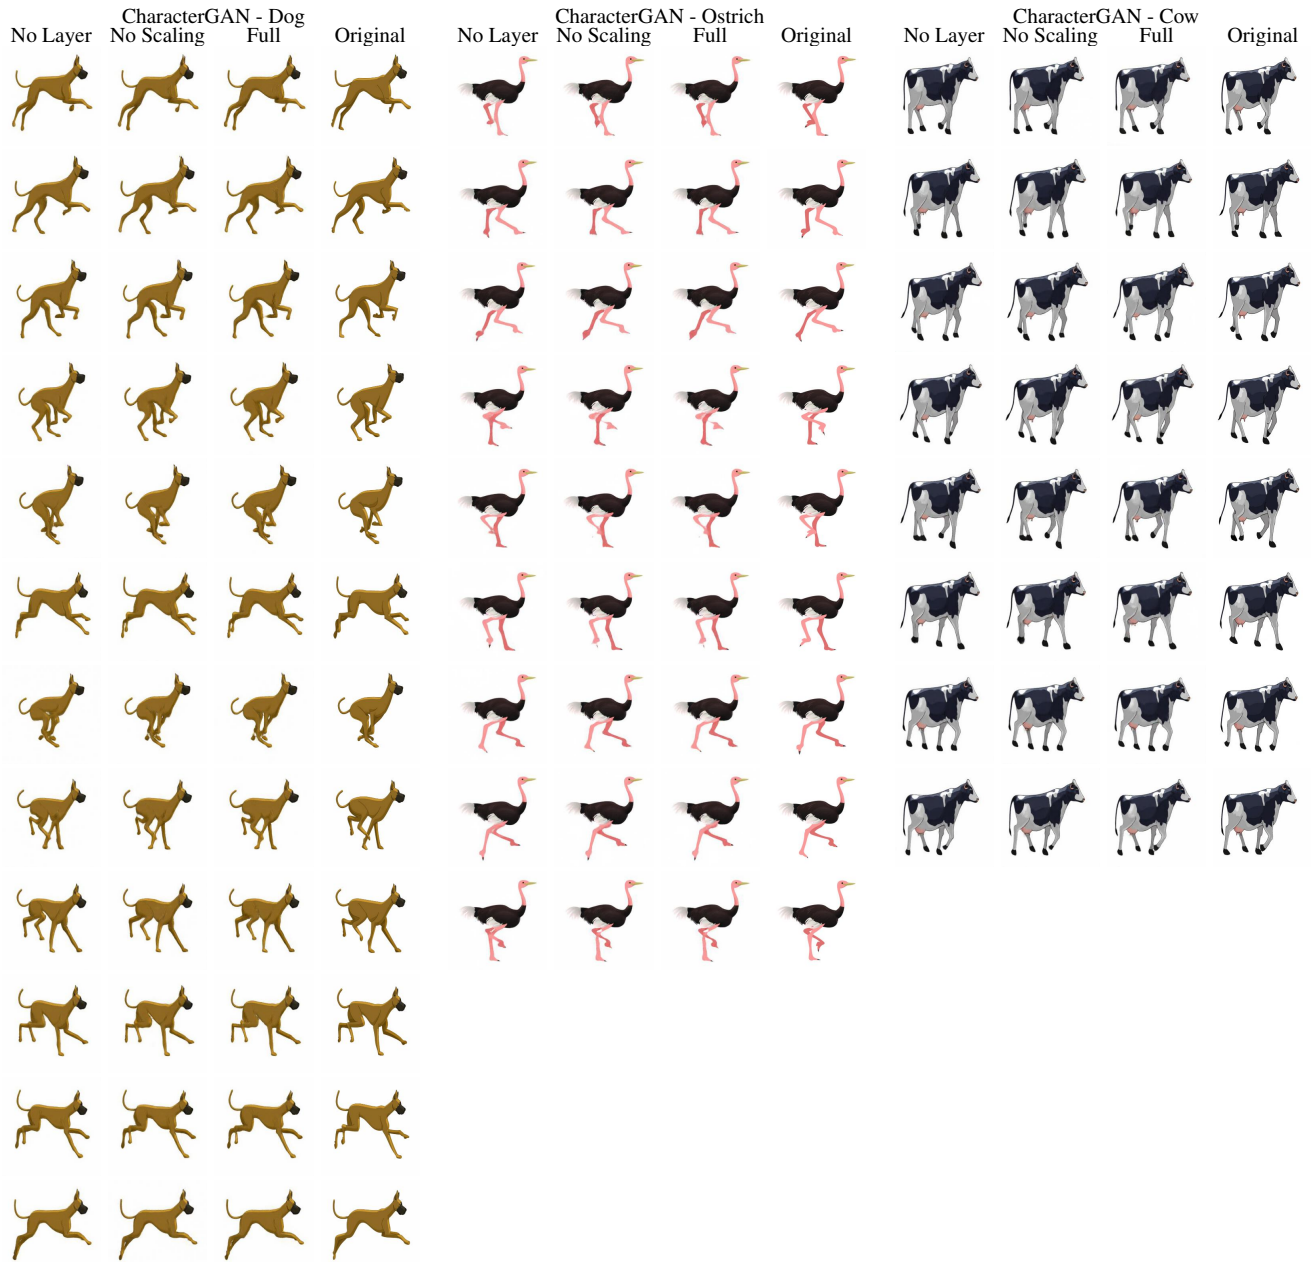



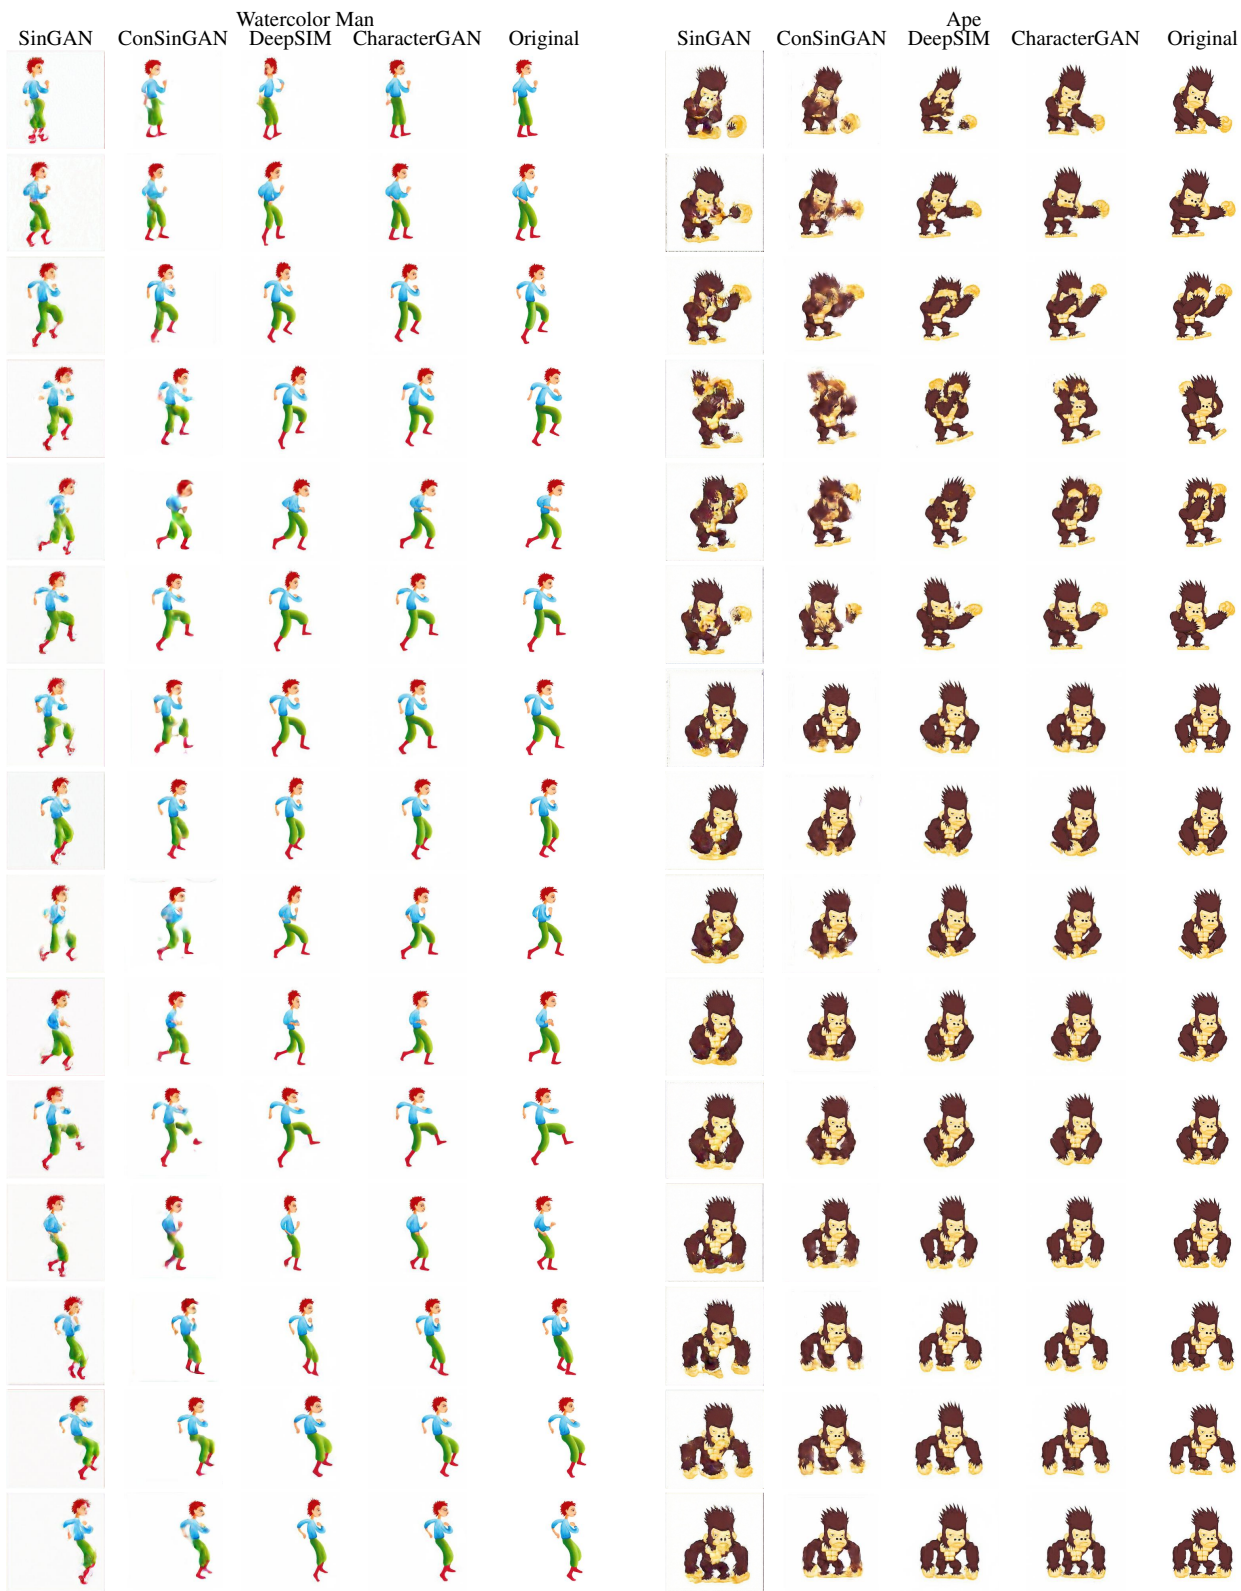

Figure 8: Qualitative examples of reconstructing held-out test images based on their keypoint locations.

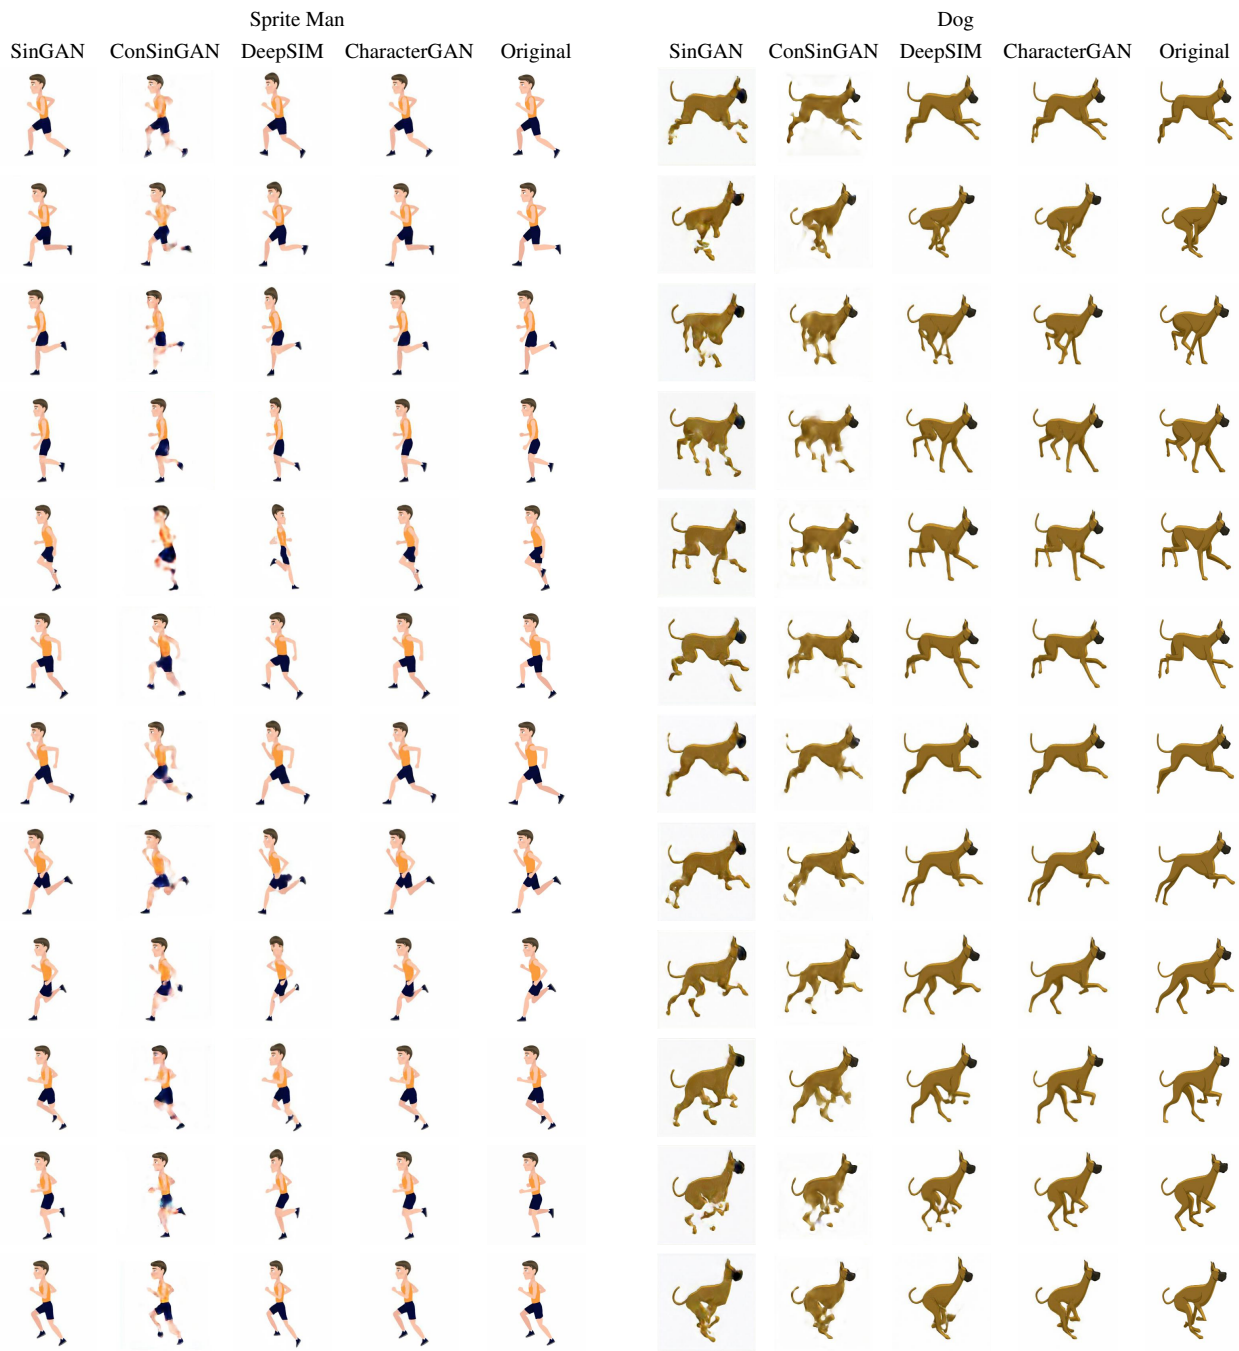

Figure 9: Qualitative examples of reconstructing held-out test images based on their keypoint locations.

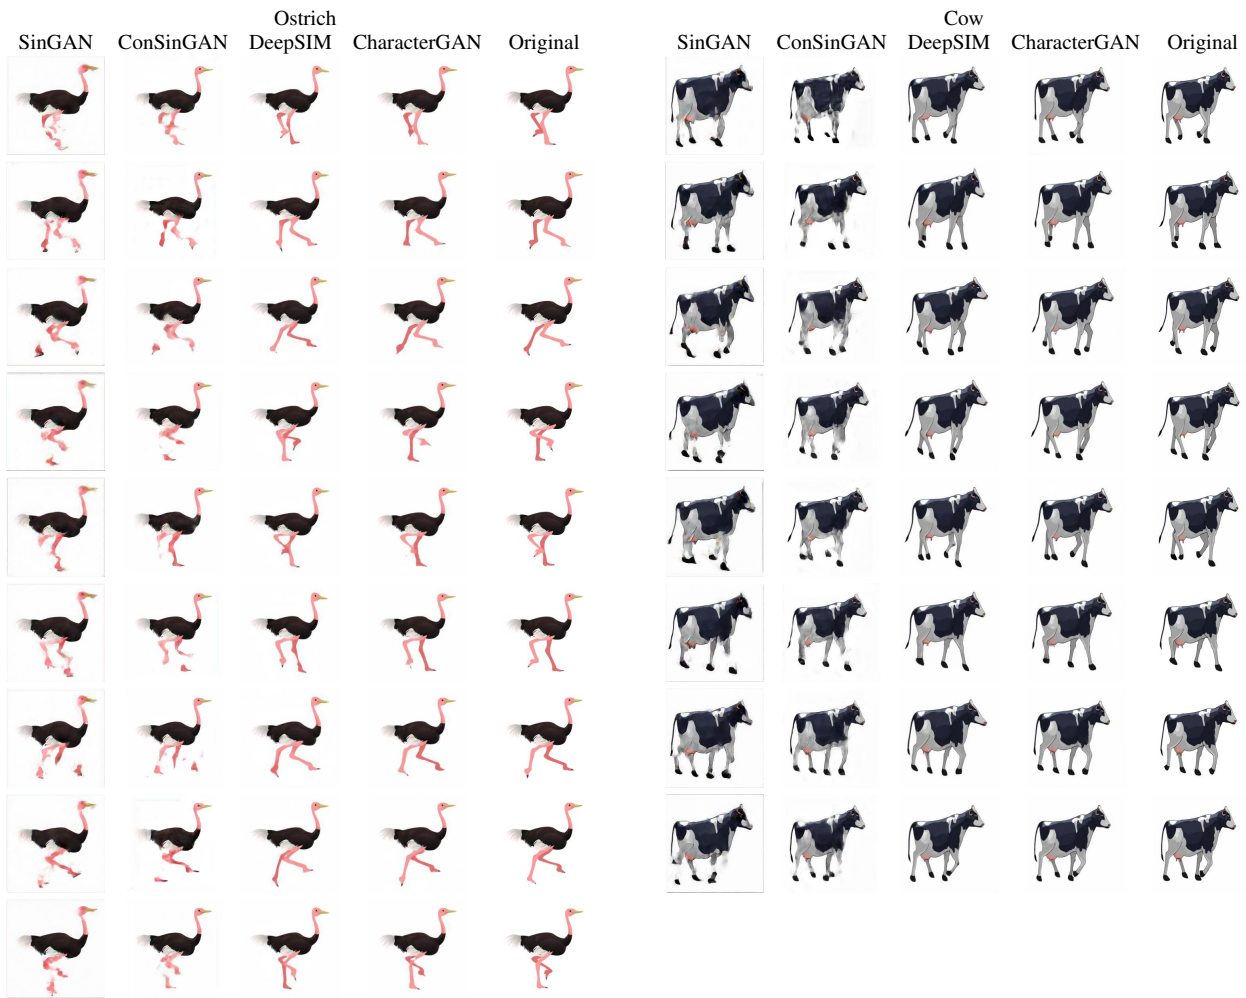

Figure 10: Qualitative examples of reconstructing held-out test images based on their keypoint locations.
